# Supplementary material for: Association of maternal exposures with adiposity at age 4/5 years in white British and Pakistani children: findings from the Born in Bradford study
Source: Springer Nature journal article supplement (doi:10.1007/s00125-017-4457-2), 2017-10-24
Supplement: MOESM1 [file 15158842]

**Electronic Supplementary Material (ESM)**  
**Tables**

**ESM table 1 comparison of distributions of all characteristics (maternal exposures, offspring outcomes, confounders) from combining imputation datasets and from observed values**

| Outcomes, confounders, from combining imputation datasets and from observed values |                     |               |                                                         |                                                         |
|------------------------------------------------------------------------------------|---------------------|---------------|---------------------------------------------------------|---------------------------------------------------------|
| Variable                                                                           | Units or categories | N missing (%) | Observed                                                | Imputed                                                 |
|                                                                                    |                     |               | Mean (SD) for continuous or % for categorical variables | Mean (SD) for continuous or % for categorical variables |
| Outcomes                                                                           |                     |               |                                                         |                                                         |
| Maternal BMI                                                                       | kg/m <sup>2</sup>   | 226 (3.7%)    | 26.1 (5.8)                                              | 26.1 (5.8)                                              |
| Fasting glucose                                                                    | mmol/l              | 224 (3.7%)    | 4.5 (0.5)                                               | 4.5 (0.6)                                               |
| Post-load glucose                                                                  | mmol/l              | 224 (3.7%)    | 5.7 (1.5)                                               | 5.7 (1.6)                                               |
| Gestational diabetes                                                               | No                  | 224 (3.7%)    | 87.7                                                    | 87.6                                                    |
|                                                                                    | Yes                 | 224 (3.7%)    | 12.3                                                    | 12.4                                                    |
| Maternal exposures and covariables                                                 |                     |               |                                                         |                                                         |
| Ethnicity (%)                                                                      | White British       | 0 (%)         | 44.8                                                    |                                                         |
|                                                                                    | Pakistani           | 0 (%)         | 55.2                                                    | NA                                                      |
| Age                                                                                | Years               | 0 (%)         | 27.3 (5.6)                                              | NA                                                      |
| Parity (%)                                                                         | 0                   | 189 (3.1%)    | 38.4                                                    | 38.2                                                    |
|                                                                                    | 1                   | 189 (3.1%)    | 28.7                                                    | 28.8                                                    |
|                                                                                    | 2                   | 189 (3.1%)    | 18.0                                                    | 18.0                                                    |
|                                                                                    | 3                   | 189 (3.1%)    | 9.2                                                     | 9.2                                                     |
|                                                                                    | 4+                  | 189 (3.1%)    | 5.8                                                     | 5.8                                                     |
| Education (%) <sup>a</sup>                                                         | <5 GCSE             | 12 (0.2%)     | 24.1                                                    | 24.1                                                    |
|                                                                                    | 5+ GCSE             | 12 (0.2%)     | 33.5                                                    | 33.4                                                    |
|                                                                                    | A level             | 12 (0.2%)     | 14.2                                                    | 14.2                                                    |

|                                         |                         |              |             |             |
|-----------------------------------------|-------------------------|--------------|-------------|-------------|
|                                         | Higher than A level     | 12 (0.2%)    | 21.7        | 21.8        |
|                                         | Other                   | 12 (0.2%)    | 6.6         | 6.6         |
| Housing tenure (%) <sup>b</sup>         | Part/outright owned     | 10 (0.2%)    | 64.5        | 64.5        |
|                                         | Not part/outright owned | 10 (0.2%)    | 35.5        | 35.5        |
| In receipt of benefits (%) <sup>c</sup> | No                      | 17 (0.3%)    | 56.0        | 56.0        |
|                                         | Yes                     | 17 (0.3%)    | 44.0        | 44.0        |
| Smoking (%) <sup>d</sup>                | No                      | 12 (0.2%)    | 82.1        | 82.0        |
|                                         | Yes                     | 12 (0.2%)    | 17.9        | 18.0        |
| Offspring exposures and covariables     |                         |              |             |             |
| Height                                  | Cm                      | 918 (15.1%)  | 108.4 (5.0) | 108.4 (5.4) |
| Weight                                  | Kg                      | 878 (14.5%)  | 19.0 (3.0)  | 19.0 (3.2)  |
| BMI                                     | kg/m <sup>2</sup>       | 918 (15.1%)  | 16.1 (1.7)  | 16.1 (1.8)  |
| Subscapular skinfold                    | Mm                      | 1442 (23.8%) | 6.3 (2.2)   | 6.3 (2.9)   |
| Triceps skinfold                        | Mm                      | 1390 (22.9%) | 10.1 (3.3)  | 10.1 (3.8)  |
| Age at measurement                      | Years                   | 1384 (22.8%) | 5.1 (0.3)   | 5.1 (0.3)   |
| Gender (%)                              | Male                    | 0 (0%)       | 50.5        | NA          |
|                                         | Female                  |              | 49.5        |             |

SD: standard deviation; NA: not applicable (for these there is no missing data)

<sup>a</sup>We equivalised the mother's highest educational qualifications (based on the qualification received and the country obtained) to UK standard attainments using 5 mutually exclusive categories as previously reported.<sup>18</sup> <sup>b</sup>Housing tenure was defined as whether the woman lived in a household where the home was either part-owned (i.e. mortgaged) or owned outright, or not (i.e. rented). <sup>c</sup>Receipt of means tested benefits was defined as anyone in the household receiving state means tested benefits. <sup>d</sup>Smoking was categorised for this study as (1) never smoking during pregnancy or (2) smoking at any time during pregnancy.

**ESM table 2 Child age and sex adjusted associations of maternal pregnancy exposures with offspring height, weight and adiposity (model 1)**

| Measure                  | Maternal BMI<br><i>Difference in means per 1 kg/m<sup>2</sup></i> |                             |                                                                | Fasting glucose<br><i>Difference in means per 1mmol/l</i> |                             |                                                                | Post-load glucose<br><i>Difference in means per 1mmol/l</i> |                             |                                                                | Gestational diabetes            |                             |                                                                |
|--------------------------|-------------------------------------------------------------------|-----------------------------|----------------------------------------------------------------|-----------------------------------------------------------|-----------------------------|----------------------------------------------------------------|-------------------------------------------------------------|-----------------------------|----------------------------------------------------------------|---------------------------------|-----------------------------|----------------------------------------------------------------|
|                          | <i>White British<br/>N=2717</i>                                   | <i>Pakistani<br/>N=3343</i> | <i>p value<br/>for ethnic<br/>interactio<br/>n<sup>a</sup></i> | <i>White British<br/>N=2717</i>                           | <i>Pakistani<br/>N=3343</i> | <i>p value<br/>for ethnic<br/>interactio<br/>n<sup>a</sup></i> | <i>White British<br/>N=2717</i>                             | <i>Pakistani<br/>N=3343</i> | <i>p value<br/>for ethnic<br/>interactio<br/>n<sup>a</sup></i> | <i>White British<br/>N=2717</i> | <i>Pakistani<br/>N=3343</i> | <i>p value<br/>for ethnic<br/>interactio<br/>n<sup>a</sup></i> |
| Height (cm)              | 0.064<br>(0.033, 0.096)                                           | 0.058<br>(0.027, 0.090)     | 0.801                                                          | 0.189<br>(-0.265, 0.643)                                  | 0.062<br>(-0.259, 0.385)    | 0.618                                                          | -0.120<br>(-0.274, 0.033)                                   | -0.081<br>(-0.194, 0.033)   | 0.720                                                          | -0.284<br>(-1.056, 0.489)       | 0.166<br>(-0.343, 0.675)    | 0.375                                                          |
| Weight (kg)              | 0.095<br>(0.077, 0.113)                                           | 0.131<br>(0.109, 0.152)     | 0.014                                                          | -0.039<br>(-0.298, 0.219)                                 | -0.149<br>(-0.359, 0.062)   | 0.823                                                          | -0.083<br>(-0.168, 0.001)                                   | -0.060<br>(-0.131, 0.010)   | 0.323                                                          | -0.086<br>(-0.519, 0.348)       | -0.164<br>(-0.495, 0.167)   | 0.728                                                          |
| BMI (kg/m <sup>2</sup> ) | 0.060<br>(0.051, 0.070)                                           | 0.089<br>(0.077, 0.102)     | 0.001                                                          | -0.088<br>(-0.237, 0.061)                                 | -0.145<br>(-0.259, 0.030)   | 0.505                                                          | -0.036<br>(-0.081, 0.009)                                   | -0.026<br>(-0.065, 0.012)   | 0.241                                                          | 0.017<br>(-0.223, 0.258)        | -0.186<br>(-0.371, 0.001)   | 0.733                                                          |
| SSF (mm)                 | 0.062<br>(0.048, 0.075)                                           | 0.079<br>(0.064, 0.096)     | 0.094                                                          | 0.062<br>(0.047, 0.076)                                   | -0.115<br>(-0.271, 0.041)   | 0.833                                                          | 0.020<br>(-0.043, 0.084)                                    | 0.001<br>(-0.055, 0.059)    | 0.228                                                          | 0.064<br>(-0.276, 0.403)        | -0.189<br>(-0.437, 0.057)   | 0.487                                                          |
| TSF (mm)                 | 0.064<br>(0.044, 0.084)                                           | 0.081<br>(0.059, 0.104)     | 0.242                                                          | 0.068<br>(0.046, 0.089)                                   | -0.068<br>(-0.300, 0.163)   | 0.341                                                          | 0.067<br>(0.046, 0.087)                                     | 0.006<br>(-0.070, 0.083)    | 0.192                                                          | -0.253<br>(-0.783, 0.278)       | -0.118<br>(-0.474, 0.238)   | 0.482                                                          |

*All results are adjusted for offspring sex, and age at measurement (Model 1). Analyses were based on the multiple imputed datasets.*

*a Testing the null hypothesis that there is no difference in associations of maternal characteristics with offspring outcomes between White British and Pakistani*

**ESM table 3a: Adjusted associations of maternal pregnancy exposures with offspring height, weight and adiposity in White British participants stratified by gender (model 2)**

| Measure                  | Maternal BMI<br><i>Difference in means per 1 kg/m<sup>2</sup></i> |                            |                                                           | Fasting glucose<br><i>Difference in means per 1mmol/l</i> |                               |                                                           | Post-load glucose<br><i>Difference in means per 1mmol/l</i> |                               |                                                           | Gestational diabetes          |                               |                                                           |
|--------------------------|-------------------------------------------------------------------|----------------------------|-----------------------------------------------------------|-----------------------------------------------------------|-------------------------------|-----------------------------------------------------------|-------------------------------------------------------------|-------------------------------|-----------------------------------------------------------|-------------------------------|-------------------------------|-----------------------------------------------------------|
|                          | Boys<br>N=1381                                                    | Girls<br>N=1336            | <i>p value for<br/>gender<br/>interaction<sup>a</sup></i> | Boys<br>N=1381                                            | Girls<br>N=1336               | <i>p value for<br/>gender<br/>interaction<sup>a</sup></i> | Boys<br>N=1381                                              | Girls<br>N=1336               | <i>p value for<br/>gender<br/>interaction<sup>a</sup></i> | Boys<br>N=1381                | Girls<br>N=1336               | <i>p value for<br/>gender<br/>interaction<sup>a</sup></i> |
| Height (cm)              | 0.050<br>(0.009,<br>0.091)                                        | 0.074<br>(0.029,<br>0.120) | 0.553                                                     | -0.160 (-<br>0.747,<br>0.427)                             | 0.055 (-<br>0.576,<br>0.687)  | 0.553                                                     | -0.145 (-<br>0.347,<br>0.057)                               | 0.053 (-<br>0.154,<br>0.259)  | 0.212                                                     | -0.735 (-<br>1.675,<br>0.204) | -0.145 (-<br>1.233,<br>0.943) | 0.408                                                     |
| Weight (kg)              | 0.085<br>(0.059,<br>0.110)                                        | 0.115<br>(0.087,<br>0.143) | 0.254                                                     | -0.083 (-<br>0.433,<br>0.267)                             | -0.036 (-<br>0.440,<br>0.367) | 0.509                                                     | -0.172 (-<br>0.288, -<br>0.056)                             | -0.004 (-<br>0.133,<br>0.125) | 0.058                                                     | -0.331 (-<br>0.891,<br>0.230) | 0.144 (-<br>0.515,<br>0.803)  | 0.178                                                     |
| BMI (kg/m <sup>2</sup> ) | 0.056<br>(0.042,<br>0.070)                                        | 0.073<br>(0.057,<br>0.089) | 0.199                                                     | -0.067 (-<br>0.265,<br>0.132)                             | -0.036 (-<br>0.267,<br>0.195) | 0.547                                                     | -0.053 (-<br>0.115,<br>0.008)                               | 0.021 (-<br>0.052,<br>0.094)  | 0.075                                                     | -0.070 (-<br>0.386,<br>0.247) | 0.197 (-<br>0.171,<br>0.565)  | 0.171                                                     |
| SSF (mm)                 | 0.055<br>(0.037,<br>0.072)                                        | 0.077<br>(0.055,<br>0.099) | 0.193                                                     | 0.059 (-<br>0.216,<br>0.334)                              | 0.010 (-<br>0.323,<br>0.343)  | 0.832                                                     | -0.044 (-<br>0.121,<br>0.034)                               | 0.009 (-<br>0.095,<br>0.114)  | 0.315                                                     | 0.060 (-<br>0.362,<br>0.482)  | 0.154 (-<br>0.385,<br>0.693)  | 0.580                                                     |
| TSF (mm)                 | 0.075<br>(0.046,<br>0.104)                                        | 0.069<br>(0.037,<br>0.100) | 0.855                                                     | -0.056 (-<br>0.502,<br>0.391)                             | -0.248 (-<br>0.760,<br>0.263) | 0.683                                                     | -0.099 (-<br>0.227,<br>0.029)                               | 0.029 (-<br>0.121,<br>0.180)  | 0.173                                                     | -0.286 (-<br>0.983,<br>0.411) | -0.070 (-<br>0.873,<br>0.732) | 0.690                                                     |

*All results are adjusted for offspring sex, and age at measurement, maternal age, parity, BMI (for maternal fasting and post-load glucose and GDM), maternal height (when the outcome was offspring height), education, housing tenure, whether anyone in the household was in receipt of means tested benefits, and smoking (Model 2). Analyses were based on the multiple imputed datasets.*

*a Testing the null hypothesis that there is no difference in associations of maternal characteristics with offspring outcomes between boys and girls*

**ESM table 3b: Adjusted associations of maternal pregnancy exposures with offspring height, weight and adiposity in Pakistani participants stratified by gender (model 2)**

| Measure                  | Maternal BMI<br><i>Difference in means per 1 kg/m<sup>2</sup></i> |                            |                                                          | Fasting glucose<br><i>Difference in means per 1mmol/l</i> |                                 |                                                          | Post-load glucose<br><i>Difference in means per 1mmol/l</i> |                               |                                                          | Gestational diabetes          |                               |                                                          |
|--------------------------|-------------------------------------------------------------------|----------------------------|----------------------------------------------------------|-----------------------------------------------------------|---------------------------------|----------------------------------------------------------|-------------------------------------------------------------|-------------------------------|----------------------------------------------------------|-------------------------------|-------------------------------|----------------------------------------------------------|
|                          | Boys<br>N=1681                                                    | Girls<br>N=1662            | <i>p</i> value for<br>gender<br>interaction <sup>a</sup> | Boys<br>N=1681                                            | Girls<br>N=1662                 | <i>p</i> value for<br>gender<br>interaction <sup>a</sup> | Boys<br>N=1681                                              | Girls<br>N=1662               | <i>p</i> value for<br>gender<br>interaction <sup>a</sup> | Boys<br>N=1681                | Girls<br>N=1662               | <i>p</i> value for<br>gender<br>interaction <sup>a</sup> |
| Height (cm)              | 0.079<br>(0.033,<br>0.125)                                        | 0.090<br>(0.045,<br>0.136) | 0.377                                                    | 0.117 (-<br>0.328,<br>0.562)                              | 0.013 (-<br>0.391,<br>0.416)    | 0.908                                                    | -0.004 (-<br>0.152,<br>0.160)                               | -0.009 (-<br>0.168,<br>0.150) | 0.614                                                    | -0.603 (-<br>0.080,<br>1.286) | 0.113 (-<br>0.554,<br>0.780)  | 0.580                                                    |
| Weight (kg)              | 0.148<br>(0.116,<br>0.180)                                        | 0.152<br>(0.121,<br>0.184) | 0.246                                                    | -0.029 (-<br>0.338,<br>0.279)                             | -0.241 (-<br>0.512,<br>0.029)   | 0.704                                                    | -0.039 (-<br>0.140, -<br>0.062)                             | -0.060 (-<br>0.161,<br>0.041) | 0.650                                                    | 0.111 (-<br>0.370,<br>0.592)  | -0.305 (-<br>0.742,<br>0.132) | 0.595                                                    |
| BMI (kg/m <sup>2</sup> ) | 0.097<br>(0.079,<br>0.115)                                        | 0.101<br>(0.083,<br>0.119) | 0.268                                                    | -0.071 (-<br>0.239,<br>0.098)                             | -0.200 (-<br>0.350, -<br>0.050) | 0.588                                                    | -0.014 (-<br>0.069,<br>0.042)                               | -0.024 (-<br>0.079,<br>0.030) | 0.772                                                    | -0.082 (-<br>0.360,<br>0.196) | -0.227 (-<br>0.468,<br>0.014) | 0.803                                                    |
| SSF (mm)                 | 0.074<br>(0.050,<br>0.097)                                        | 0.113<br>(0.087,<br>0.139) | 0.030                                                    | -0.056 (-<br>0.283,<br>0.171)                             | -0.143 (-<br>0.366,<br>0.080)   | 0.942                                                    | -0.021 (-<br>0.099,<br>0.056)                               | 0.049 (-<br>0.037,<br>0.135)  | 0.139                                                    | -0.038 (-<br>0.364,<br>0.288) | -0.229 (-<br>0.593,<br>0.134) | 0.757                                                    |
| TSF (mm)<br>Boys         | 0.096<br>(0.064,<br>0.128)                                        | 0.105<br>(0.067,<br>0.141) | 0.699                                                    | -0.032 (-<br>0.379,<br>0.315)                             | -0.052 (-<br>0.368,<br>0.264)   | 0.948                                                    | 0.010 (-<br>0.099,<br>0.118)                                | 0.053 (-<br>0.063,<br>0.169)  | 0.580                                                    | -0.353 (-<br>0.353,<br>0.663) | -0.200 (-<br>0.710,<br>0.310) | 0.417                                                    |

All results are adjusted for offspring sex, and age at measurement, maternal age, parity, BMI (for maternal fasting and post-load glucose and GDM), maternal height (when the outcome was offspring height), education, housing tenure, whether anyone in the household was in receipt of means tested benefits, and smoking (Model 2). Analyses were based on the multiple imputed datasets.

<sup>a</sup> Testing the null hypothesis that there is no difference in associations of maternal characteristics with offspring outcomes between boys and girls

**ESM table 4**

**Adjusted associations between maternal pregnancy exposures and child adiposity with both ethnic groups combined using multivariable imputed datasets (n=6060)**

| Measure                     | Maternal BMI<br><i>Difference in means per<br/>1 kg/m<sup>2</sup></i> | Fasting glucose<br><i>Difference in means per<br/>1 mmol/l</i> | Post-load glucose<br><i>Difference in means per<br/>1 mmol/l</i> | Gestational diabetes       |
|-----------------------------|-----------------------------------------------------------------------|----------------------------------------------------------------|------------------------------------------------------------------|----------------------------|
| Height<br>(cm)              | 0.073<br>(0.051, 0.095)                                               | 0.035<br>(-0.212, 0.282)                                       | -0.025<br>(-0.112, 0.062)                                        | 0.102<br>(-0.319, 0.524)   |
| Weight<br>(kg)              | 0.124<br>(0.109, 0.139)                                               | -0.095<br>(-0.264, 0.075)                                      | -0.065<br>(-0.119, -0.009)                                       | -0.096<br>(-0.373, 0.181)  |
| BMI<br>(kg/m <sup>2</sup> ) | 0.081<br>(0.072, 0.089)                                               | -0.098<br>(-0.193, -0.003)                                     | -0.016<br>(-0.046, -0.013)                                       | -0.084<br>(-0.234, 0.065)  |
| SSF<br>(mm)                 | 0.078<br>(0.067, 0.089)                                               | -0.055<br>(-0.177, 0.061)                                      | -0.005<br>(-0.038, 0.047)                                        | -0.063<br>(-0.273, 0.136)  |
| TSF<br>(mm)                 | 0.085<br>(0.069, 0.101)                                               | -0.056<br>(-0.251, -0.139)                                     | -0.007<br>(-0.056, -0.070)                                       | -0.078<br>(-0.375, -0.219) |

*All results are adjusted for offspring sex, and age at measurement, maternal age, parity, BMI (for maternal fasting and post-load glucose and GDM), maternal height (when the outcome was offspring height), education, housing tenure, whether anyone in the household was in receipt of means tested benefits, and smoking (Model 2). Analyses were based on the multiple imputed datasets.*

ESM table 5

Adjusted associations based on complete case analyses presented as mean differences for both groups stratified by ethnicity with interaction p-values

| Measure                  | Maternal BMI<br><i>Difference in means per 1 kg/m<sup>2</sup></i> |                             |                                                   | Fasting glucose<br><i>Difference in means per 1mmol/l</i> |                             |                                                   | Post-load glucose<br><i>Difference in means per 1mmol/l</i> |                             |                                                   | Gestational diabetes            |                             |                                                   |
|--------------------------|-------------------------------------------------------------------|-----------------------------|---------------------------------------------------|-----------------------------------------------------------|-----------------------------|---------------------------------------------------|-------------------------------------------------------------|-----------------------------|---------------------------------------------------|---------------------------------|-----------------------------|---------------------------------------------------|
|                          | <i>White British<br/>N=1725</i>                                   | <i>Pakistani<br/>N=1941</i> | <i>p value for ethnic interaction<sup>a</sup></i> | <i>White British<br/>N=1725</i>                           | <i>Pakistani<br/>N=1941</i> | <i>p value for ethnic interaction<sup>a</sup></i> | <i>White British<br/>N=1725</i>                             | <i>Pakistani<br/>N=1941</i> | <i>p value for ethnic interaction<sup>a</sup></i> | <i>White British<br/>N=1725</i> | <i>Pakistani<br/>N=1941</i> | <i>p value for ethnic interaction<sup>a</sup></i> |
| Height (cm)              | 0.063<br>(0.028, 0.098)                                           | 0.062<br>(.022, 0.101)      | 0.997                                             | -0.369<br>(-0.871, 0.132)                                 | 0.218<br>(-0.138, 0.575)    | 0.102                                             | -0.166<br>(-0.326, -0.006)                                  | -0.003<br>(-0.131, 0.124)   | 0.162                                             | -0.800<br>(-1.62, 0.020)        | 0.597<br>(0.039, 1.154)     | 0.009                                             |
| Weight (kg)              | 0.094<br>(0.073, 0.115)                                           | 0.125<br>(0.099, 0.152)     | 0.086                                             | -0.184<br>(-0.487, 0.119)                                 | -0.008<br>(-0.243, 0.228)   | 0.272                                             | -0.139<br>(-0.235, -0.042)                                  | -0.055<br>(-0.139, 0.028)   | 0.211                                             | -0.176<br>(-0.673, 0.319)       | -0.027<br>(-0.396, 0.340)   | 0.503                                             |
| BMI (kg/m <sup>2</sup> ) | 0.060<br>(0.049, 0.072)                                           | 0.088<br>(0.073, 0.103)     | 0.006                                             | -0.062<br>(-0.228, 0.104)                                 | -0.071<br>(-0.203, 0.061)   | 0.516                                             | -0.026<br>(-0.079, 0.027)                                   | -0.022<br>(-0.069, 0.025)   | 0.631                                             | 0.081<br>(-0.191, 0.353)        | -0.166<br>(-0.372, 0.041)   | 0.405                                             |
| SSF (mm)                 | 0.055<br>(0.039, 0.070)                                           | 0.067<br>(0.046, 0.087)     | 0.396                                             | 0.026<br>(-0.193, 0.245)                                  | -0.093<br>(-0.277, 0.089)   | 0.757                                             | -0.023<br>(-0.092, 0.047)                                   | 0.006<br>(-0.059, 0.071)    | 0.381                                             | 0.137<br>(-0.222, 0.496)        | -0.164<br>(-0.451, 0.122)   | 0.341                                             |
| TSF (mm)                 | 0.057<br>(0.033, 0.082)                                           | 0.070<br>(0.042, 0.098)     | 0.480                                             | -0.237<br>(-0.588, 0.115)                                 | 0.005<br>(-0.248, 0.257)    | 0.176                                             | -0.066<br>(-0.178, 0.046)                                   | 0.004<br>(-0.086, 0.094)    | 0.248                                             | -0.362<br>(-0.938, 0.213)       | -0.109<br>(-0.504, 0.286)   | 0.347                                             |

All results are adjusted for offspring sex, and age at measurement, maternal age, parity, BMI (for maternal fasting and post-load glucose and GDM), maternal height (when the outcome was offspring height), education, housing tenure, whether anyone in the household was in receipt of means tested benefits, and smoking (Model 2).

<sup>a</sup> Testing the null hypothesis that there is no difference in associations of maternal characteristics with offspring outcomes between White British and Pakistani

**ESM table 6****Adjusted associations based on complete case analyses presented as mean differences for both groups combined (n=3666)**

| Measure                     | Maternal BMI<br><i>Difference in means per<br/>1 kg/m<sup>2</sup></i> | Fasting glucose<br><i>Difference in means per<br/>1mmol/l</i> | Post-load glucose<br><i>Difference in means per<br/>1mmol/l</i> | Gestational diabetes      |
|-----------------------------|-----------------------------------------------------------------------|---------------------------------------------------------------|-----------------------------------------------------------------|---------------------------|
| Height<br>(cm)              | 0.063<br>(0.036, 0.089)                                               | 0.032<br>(-0.255, 0.321)                                      | -0.065<br>(-0.165, .033)                                        | 0.167<br>(-0.289, 0.624)  |
| Weight<br>(kg)              | 0.108<br>(0.092, 0.125)                                               | -0.063<br>(-0.247, 0.120)                                     | -0.089<br>(-0.151, -0.026)                                      | -0.065<br>(-0.357, 0.225) |
| BMI<br>(kg/m <sup>2</sup> ) | 0.073<br>(0.064, 0.082)                                               | -0.066<br>(-0.168, 0.036)                                     | -0.024<br>(-0.059, 0.011)                                       | -0.079<br>(-0.241, 0.082) |
| SSF<br>(mm)                 | 0.060<br>(0.047, 0.073)                                               | -0.057<br>(-0.196, 0.081)                                     | -0.004<br>(-0.051, 0.043)                                       | -0.069<br>(-0.289, 0.149) |
| TSF<br>(mm)                 | 0.062<br>(0.044, 0.080)                                               | -0.072<br>(-0.276, 0.131)                                     | -0.022<br>(-0.092, 0.048)                                       | -0.179<br>(-0.501, 0.144) |

*All results are adjusted for offspring sex, and age at measurement, maternal age, parity, BMI (for maternal fasting and post-load glucose and GDM), maternal height (when the outcome was offspring height), education, housing tenure, whether anyone in the household was in receipt of means tested benefits, and smoking (Model 2).*



**ESM table 7**

**Adjusted associations between maternal pregnancy exposures and child adiposity by ethnicity using multivariable imputed datasets excluding women with GDM**

| Measure                  | Maternal BMI<br><i>Difference in means per 1 kg/m<sup>2</sup></i> |                             |                                                           | Fasting glucose<br><i>Difference in means per 1mmol/l</i> |                              |                                                           | Post-load glucose<br><i>Difference in means per 1mmol/l</i> |                              |                                                           |
|--------------------------|-------------------------------------------------------------------|-----------------------------|-----------------------------------------------------------|-----------------------------------------------------------|------------------------------|-----------------------------------------------------------|-------------------------------------------------------------|------------------------------|-----------------------------------------------------------|
|                          | <i>White British<br/>N=2530</i>                                   | <i>Pakistani<br/>N=2814</i> | <i>p value for<br/>ethnic<br/>interaction<sup>a</sup></i> | <i>White British<br/>N=2530</i>                           | <i>Pakistani<br/>N=2814</i>  | <i>p value for<br/>ethnic<br/>interaction<sup>a</sup></i> | <i>White<br/>British<br/>N=2530</i>                         | <i>Pakistani<br/>N=2814</i>  | <i>p value for<br/>ethnic<br/>interaction<sup>a</sup></i> |
| Height (cm)              | 0.066<br>(0.034,<br>0.099)                                        | 0.086<br>(0.048,<br>0.123)  | 0.568                                                     | 0.248<br>(-0.354,<br>0.851)                               | 0.037<br>(-0.546,<br>0.620)  | 0.648                                                     | 0.039<br>(-0.129,<br>0.208)                                 | -0.056<br>(-0.225,<br>0.112) | 0.388                                                     |
| Weight (kg)              | 0.101<br>(0.081,<br>0.121)                                        | 0.161<br>(0.135,<br>0.186)  | 0.001                                                     | 0.063<br>(-0.299,<br>0.425)                               | -0.004<br>(-0.387,<br>0.379) | 0.827                                                     | -0.075<br>(-0.171,<br>0.021)                                | -0.078<br>(-0.191,<br>0.035) | 0.886                                                     |
| BMI (kg/m <sup>2</sup> ) | 0.065<br>(0.053,<br>0.076)                                        | 0.108<br>(0.093,<br>0.122)  | 0.000                                                     | -0.024<br>(-0.223,<br>0.176)                              | -0.033<br>(-0.249,<br>0.183) | 0.460                                                     | -0.013<br>(-0.066,<br>0.039)                                | -0.014<br>(-0.078,<br>0.049) | 0.682                                                     |
| SSF (mm)                 | 0.065<br>(0.050,<br>0.079)                                        | 0.101<br>(0.081,<br>0.121)  | 0.010                                                     | 0.032<br>(-0.226,<br>0.289)                               | -0.108<br>(-0.401,<br>0.184) | 0.921                                                     | -0.016<br>(-0.092,<br>0.060)                                | 0.003<br>(-0.087,<br>0.093)  | 0.520                                                     |
| TSF (mm)                 | 0.075<br>(0.053,<br>0.098)                                        | 0.109<br>(0.082,<br>0.136)  | 0.087                                                     | -0.001<br>(-0.425,<br>0.424)                              | 0.049<br>(-0.388,<br>0.486)  | 0.635                                                     | -0.008<br>(-0.118,<br>0.101)                                | 0.042<br>(-0.077,<br>0.160)  | 0.517                                                     |

*All results are adjusted for offspring sex, and age at measurement, maternal age, parity, BMI (for maternal fasting and post-load glucose and GDM), maternal height (when the outcome was offspring height), education, housing tenure, whether anyone in the household was in receipt of means tested benefits, and smoking (Model 2). Analyses were based on the multiple imputed datasets.*

*a Testing the null hypothesis that there is no difference in associations of maternal characteristics with offspring outcomes between White British and Pakistani*

**ESM table 8 Adjusted associations between maternal fasting glucose and child adiposity by ethnicity using multivariable imputed datasets with results presented separately for women with a BMI $\geq$ 25 and those with a BMI<25**

| Measure                  | Fasting glucose<br>Difference in means per 1mmol/l |                              |                                         |                           |                              |                                         |
|--------------------------|----------------------------------------------------|------------------------------|-----------------------------------------|---------------------------|------------------------------|-----------------------------------------|
|                          | White British<br>N=2717                            |                              |                                         | Pakistani<br>N=3343       |                              |                                         |
|                          | BMI<br><25<br>N = 1198                             | BMI<br>$\geq$ 25<br>N = 1519 | p-value for<br>interaction <sup>a</sup> | BMI<br><25<br>N = 1678    | BMI<br>$\geq$ 25<br>N = 1665 | p-value for<br>interaction <sup>a</sup> |
| BMI (kg/m <sup>2</sup> ) | -0.036<br>(-0.308, 0.237)                          | -0.059<br>(-0.255, 0.138)    | 0.657                                   | -0.005<br>(-0.216, 0.206) | -0.180<br>(-0.318, -0.042)   | 0.934                                   |
| SSF (mm)                 | 0.164<br>(-0.157, 0.485)                           | -0.028<br>(-0.295, 0.239)    | 0.539                                   | 0.014<br>(-0.278, 0.307)  | -0.139<br>(-0.325, 0.048)    | 0.281                                   |
| TSF (mm)                 | 0.073<br>(-0.484, 0.629)                           | -0.242<br>(-0.667, 0.182)    | 0.348                                   | 0.197<br>(-0.219, 0.614)  | -0.107<br>(-0.379, 0.164)    | 0.167                                   |

All results are adjusted for offspring sex, and age at measurement, maternal age, parity, BMI (for maternal fasting and post-load glucose and GDM), maternal height (when the outcome was offspring height), education, housing tenure, whether anyone in the household was in receipt of means tested benefits, and smoking (Model 2). Analyses were based on the multiple imputed datasets.

<sup>a</sup> Testing the null hypothesis that there is no difference in associations of BMI with offspring outcomes between the 2 BMI groups (<25;  $\geq$ 25)
